# Supplementary material for: Costs of vitamin D testing and prescribing among children in primary care
Source: Springer Nature journal article supplement (doi:10.1007/s00431-017-2986-9), 2017-08-12
Supplement: MOESM1 [file 14212982]

**Supplementary Table 1** Costs of vitamin D prescriptions and tests in children in primary care, by year between 2000 and 2014.

| Year | PY of follow-up | Vitamin D Prescriptions |                              |                                                 |                                 | Vitamin D Tests |                              |                                              | Combined cost of vitamin D prescriptions and tests per 100,000 PY, £ (95% CI) |
|------|-----------------|-------------------------|------------------------------|-------------------------------------------------|---------------------------------|-----------------|------------------------------|----------------------------------------------|-------------------------------------------------------------------------------|
|      |                 | n                       | Rate per 100,000 PY (95% CI) | Mean prescription cost, £ (95% CI) <sup>a</sup> | Cost per 100,000 PY, £ (95% CI) | n               | Rate per 100,000 PY (95% CI) | Cost per 100,000 PY, £ (95% CI) <sup>b</sup> |                                                                               |
| 2000 | 161,897         | 0                       | 0                            | -                                               | -                               | 1               | 0.62<br>(0.09 to 4.38)       | 9.27<br>(1.31 to 65.8)                       | 9.27<br>(1.31 to 65.8)                                                        |
| 2001 | 180,797         | 2                       | 1.11<br>(0.28 to 4.42)       | 37.7<br>(12.3 to 63.0)                          | 41.7<br>(3.41 to 279)           | 2               | 1.11<br>(0.28 to 4.42)       | 16.6<br>(4.15 to 66.3)                       | 58.3<br>(7.56 to 345)                                                         |
| 2002 | 211,593         | 0                       | 0                            | -                                               | -                               | 2               | 0.95<br>(0.24 to 3.78)       | 14.2<br>(3.55 to 56.7)                       | 14.2<br>(3.55 to 56.7)                                                        |
| 2003 | 222,486         | 1                       | 0.45<br>(0.06 to 3.19)       | 9.10<br>(9.10 to 9.10)                          | 4.09<br>(0.58 to 29.0)          | 7               | 3.15<br>(1.50 to 6.60)       | 47.2<br>(22.5 to 99.0)                       | 51.3<br>(23.1 to 128)                                                         |
| 2004 | 235,500         | 4                       | 1.70<br>(0.64 to 4.53)       | 175<br>(105 to 210)                             | 297<br>(66.6 to 950)            | 19              | 8.07<br>(5.15 to 12.7)       | 121<br>(77.2 to 190)                         | 418<br>(144 to 1140)                                                          |
| 2005 | 244,548         | 17                      | 6.95<br>(4.32 to 11.2)       | 455<br>(277 to 653)                             | 3164<br>(1197 to 7299)          | 20              | 8.18<br>(5.28 to 12.7)       | 123<br>(79.1 to 190)                         | 3286<br>(1276 to 7489)                                                        |
| 2006 | 251,499         | 18                      | 7.16<br>(4.51 to 11.4)       | 188<br>(156 to 210)                             | 1349<br>(703 to 2386)           | 23              | 9.15<br>(6.08 to 13.8)       | 137<br>(91.2 to 206)                         | 1486<br>(794 to 2592)                                                         |
| 2007 | 257,336         | 17                      | 6.61<br>(4.11 to 10.6)       | 156<br>(114 to 196)                             | 1033<br>(471 to 2085)           | 44              | 17.1<br>(12.7 to 23.0)       | 256<br>(191 to 345)                          | 1290<br>(662 to 2430)                                                         |
| 2008 | 265,314         | 22                      | 8.29<br>(5.46 to 12.6)       | 120<br>(71.8 to 177)                            | 997<br>(392 to 2227)            | 115             | 43.3<br>(36.1 to 52.0)       | 650<br>(542 to 781)                          | 1647<br>(934 to 3007)                                                         |
| 2009 | 270,643         | 65                      | 24.0<br>(18.8 to 30.6)       | 201<br>(136 to 285)                             | 4818<br>(2563 to 8717)          | 240             | 88.7<br>(78.1 to 101)        | 1330<br>(1172 to 1510)                       | 6148<br>(3735 to 10,226)                                                      |
| 2010 | 278,167         | 106                     | 38.1<br>(31.5 to 46.1)       | 123<br>(97.4 to 151)                            | 4696<br>(3067 to 6983)          | 431             | 155<br>(141 to 170)          | 2324<br>(2115 to 2554)                       | 7020<br>(5182 to 9537)                                                        |
| 2011 | 284,678         | 266                     | 93.4<br>(82.9 to 105)        | 75.9<br>(59.0 to 97.7)                          | 7092<br>(4887 to 10,298)        | 733             | 257<br>(240 to 277)          | 3862<br>(3593 to 4152)                       | 10,954<br>(8480 to 14,450)                                                    |
| 2012 | 288,818         | 912                     | 316<br>(296 to 337)          | 47.6<br>(42.1 to 53.5)                          | 15,034<br>(12,448 to 18,015)    | 1385            | 480<br>(455 to 505)          | 7193<br>(6824 to 7582)                       | 22,227<br>(19,272 to 25,597)                                                  |
| 2013 | 283,990         | 1604                    | 565<br>(538 to 593)          | 34.7<br>(31.7 to 38.0)                          | 19,617<br>(17,032 to 22,548)    | 2064            | 727<br>(696 to 759)          | 10,902<br>(10,441 to 11,382)                 | 30,519<br>(27,473 to 33,931)                                                  |
| 2014 | 253,097         | 1551                    | 613<br>(583 to 644)          | 28.4<br>(26.3 to 30.6)                          | 17,397<br>(15,347 to 19,700)    | 1943            | 768<br>(734 to 803)          | 11,515<br>(11,015 to 12,039)                 | 28,913<br>(26,361 to 31,739)                                                  |

CI confidence interval, PY person-years.

<sup>a</sup> Confidence intervals around mean prescription costs were calculated using bootstrapping with the percentile method, in view of the skewed nature of the data.

<sup>b</sup> The unit cost of a 25-OH-D test was priced at £15.
