# Supplementary material for: Costs of vitamin D testing and prescribing among children in primary care
Source: Springer Nature journal article supplement (doi:10.1007/s00431-017-2986-9), 2017-08-12
Supplement: MOESM2 [file 14212982]

**Supplementary Table 2** Associations between demographic factors and rates of vitamin D testing and prescribing <sup>a</sup>

| Characteristic                | Vitamin D Testing    |                      | Vitamin D Prescribing |                      |
|-------------------------------|----------------------|----------------------|-----------------------|----------------------|
|                               | Adjusted RR (95% CI) | P value <sup>b</sup> | Adjusted RR (95% CI)  | P value <sup>b</sup> |
| Sex                           |                      | <0.001               |                       | <0.001               |
| Male                          | 1                    |                      | 1                     |                      |
| Female                        | 1.49 (1.41-1.57)     |                      | 1.41 (1.32-1.50)      |                      |
| Age group                     |                      | <0.001               |                       | <0.001               |
| 0-4 years                     | 1                    |                      | 1                     |                      |
| 5-9 years                     | 1.62 (1.49-1.77)     |                      | 2.00 (1.78-2.26)      |                      |
| 10-14 years                   | 2.97 (2.74-3.22)     |                      | 4.40 (3.95-4.90)      |                      |
| 15-17 years                   | 5.02 (4.62-5.46)     |                      | 6.90 (6.18-7.71)      |                      |
| Ethnicity <sup>c</sup>        |                      | <0.001               |                       | <0.001               |
| White                         | 1                    |                      | 1                     |                      |
| Asian or Asian British        | 6.22 (5.76-6.72)     |                      | 9.60 (8.73-10.6)      |                      |
| Black or black British        | 3.80 (3.46-4.18)     |                      | 5.54 (4.93-6.23)      |                      |
| Mixed                         | 2.55 (2.20-2.94)     |                      | 2.57 (2.11-3.13)      |                      |
| Chinese or other ethnic group | 3.33 (2.94-3.77)     |                      | 3.93 (3.37-4.60)      |                      |
| Area of residence             |                      | 0.231                |                       | 0.149                |
| Urban                         | 1                    |                      | 1                     |                      |
| Rural                         | 0.88 (0.71-1.09)     |                      | 0.85 (0.67-1.06)      |                      |
| Season <sup>d</sup>           |                      | <0.001               |                       | <0.001               |
| Summer                        | 1                    |                      | 1                     |                      |
| Autumn                        | 1.00 (0.93-1.08)     |                      | 0.95 (0.87-1.05)      |                      |
| Winter                        | 1.00 (0.93-1.08)     |                      | 1.00 (0.91-1.09)      |                      |
| Spring                        | 1.17 (1.09-1.26)     |                      | 1.16 (1.06-1.27)      |                      |

*CI* confidence interval, *RR* rate ratio.

<sup>a</sup> Results of multivariable Poisson regression models of rates of vitamin D testing and prescribing. Models adjusted for all variables listed in the table, and additionally included the general practice as a random effect. Missing data was handled using complete cases analysis. N=526,890.

<sup>b</sup> P values from likelihood ratio tests comparing nested models.

<sup>c</sup> Ethnicity data was taken from the child's THIN or HES record for 82.8% of children. Maternal ethnicity was used as a proxy measure for the remaining 17.2%.

<sup>d</sup> Summer was defined as June to August, autumn as September to November, winter as December to February, and spring as March to May.
